# Supplementary material
Source: Springer Nature journal article supplement (https://www.springermedizin.de/resource/supplementary/13012_2012_506_MOESM4_ESM.pdf/9630192)
Supplement: MOESM4 [file 9630192]

CG: a set of purposeful activities, based on the perceived situation as complex, designed to explore the situation and improve the quality of care

CG implementation: to fulfill this set of purposeful activities

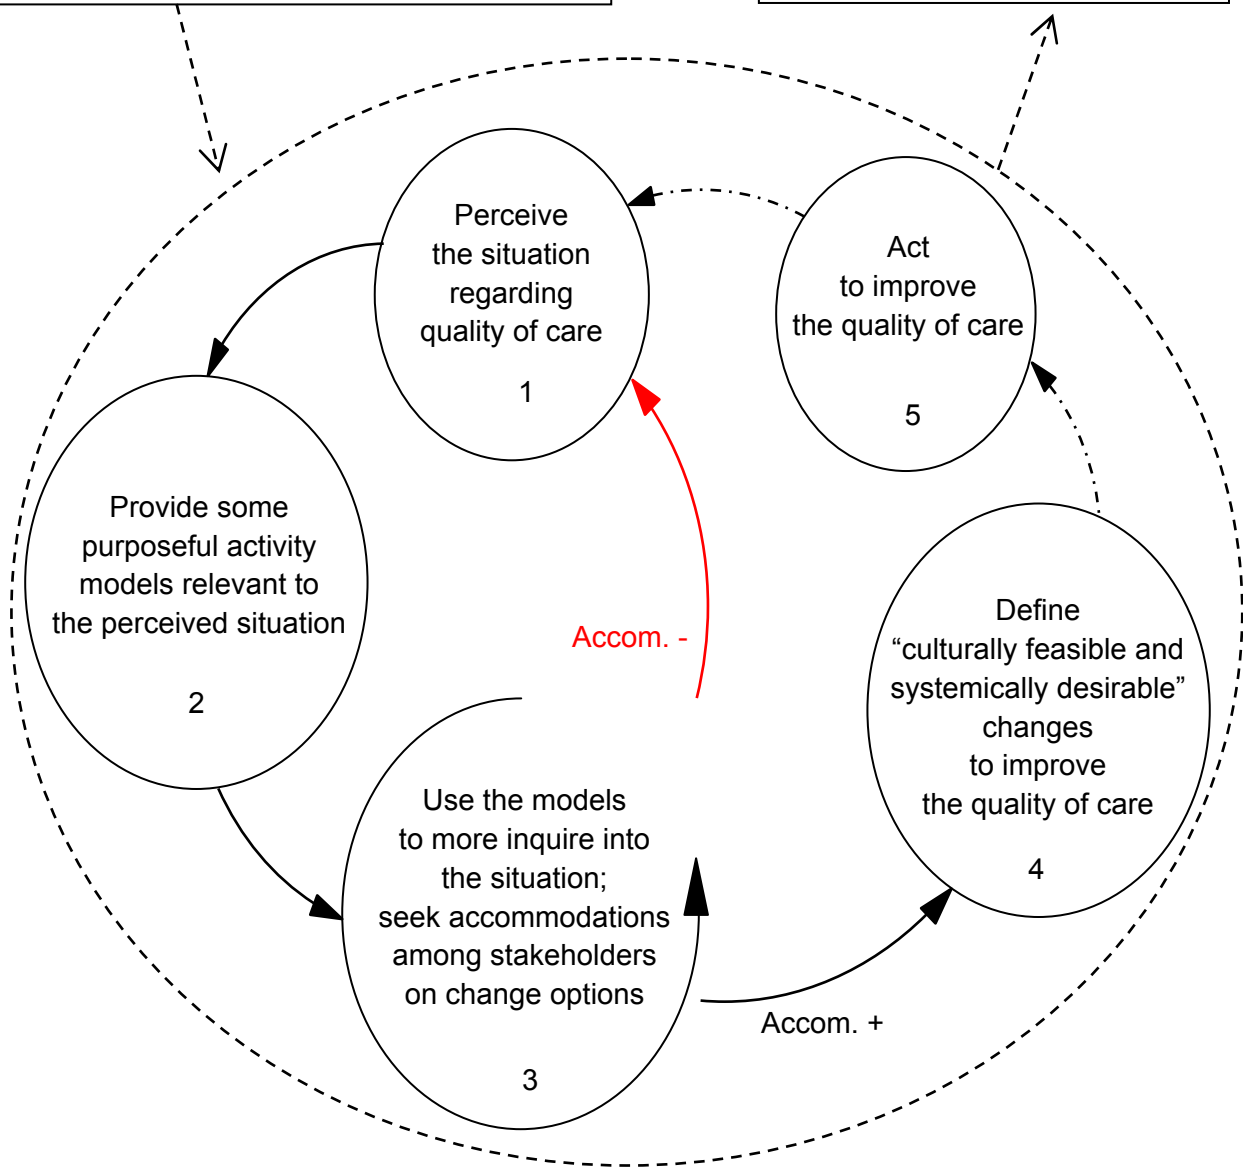

Accom. + : Accommodation achieved

Accom. - : Accommodation Not yet achieved
